# Supplementary material for: One-pot synthesis and application of novel amino-functionalized silica nanoparticles using guanidine as amino group
Source: Royal Society of Chemistry journal article supplement (doi:10.1039/c6nj02094a), 2016-01-01
Supplement: c6nj02094a1.pdf [file c6nj02094a1.pdf]

**Electronic Supplementary Material (ESI) for New Journal of Chemistry.  
This journal is © The Royal Society of Chemistry 2015**

**One-pot Synthesis and application of novel amino-functionalized  
silica nanoparticles using guanidine as amino group**

Feng Guodong,<sup>a</sup> Guan Mingming,<sup>a</sup> Lai Qi,<sup>a</sup> Mi Hongyu,<sup>a</sup> Li Guanghua,<sup>b</sup> Ma Qiang,<sup>a</sup> Fei Qiang,<sup>a</sup> Huan Yanfu<sup>a</sup> and Song Zhiguang<sup>a\*</sup>

---

<sup>a</sup> College of Chemistry, Jilin University, Changchun 130021, P. R. China.

<sup>b</sup> State Key Laboratory of Inorganic Synthesis and Preparative Chemistry, College of Chemistry, Jilin University, Changchun 130021, China.

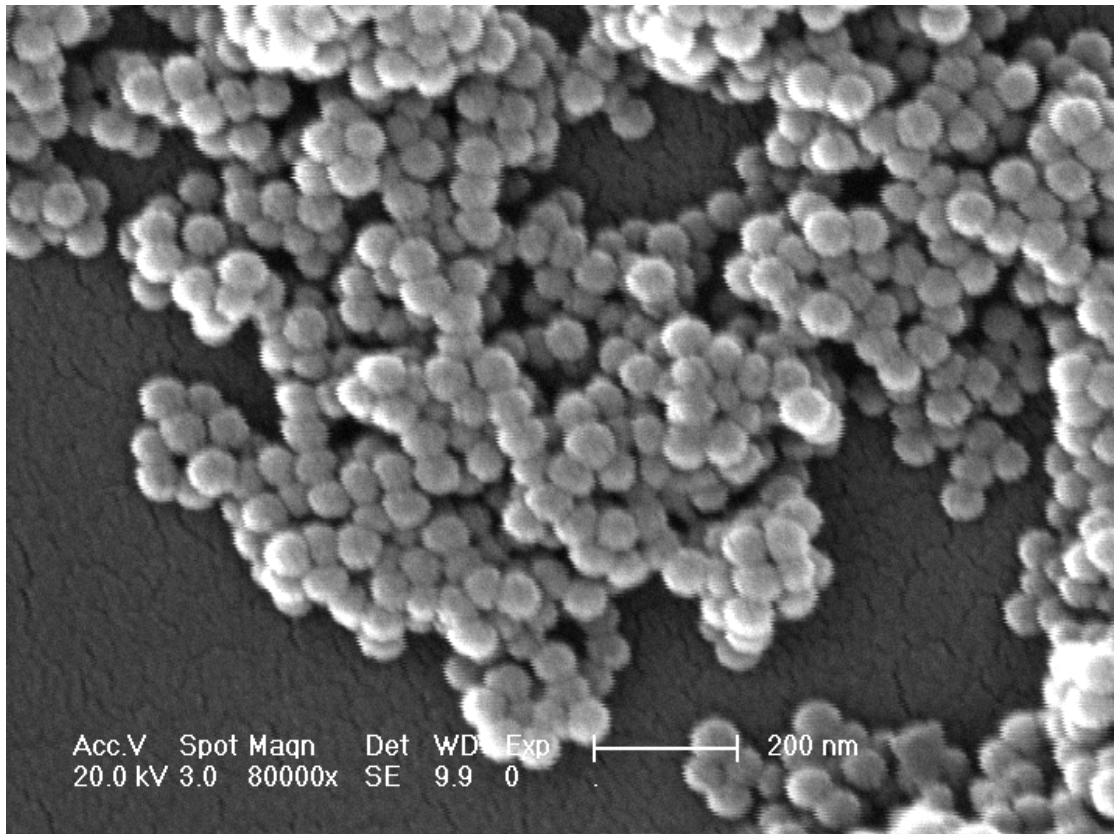

**Fig S1** SEM images of the guanidine-modified SiNPs: TEOS/Guanidine (1:0.5)

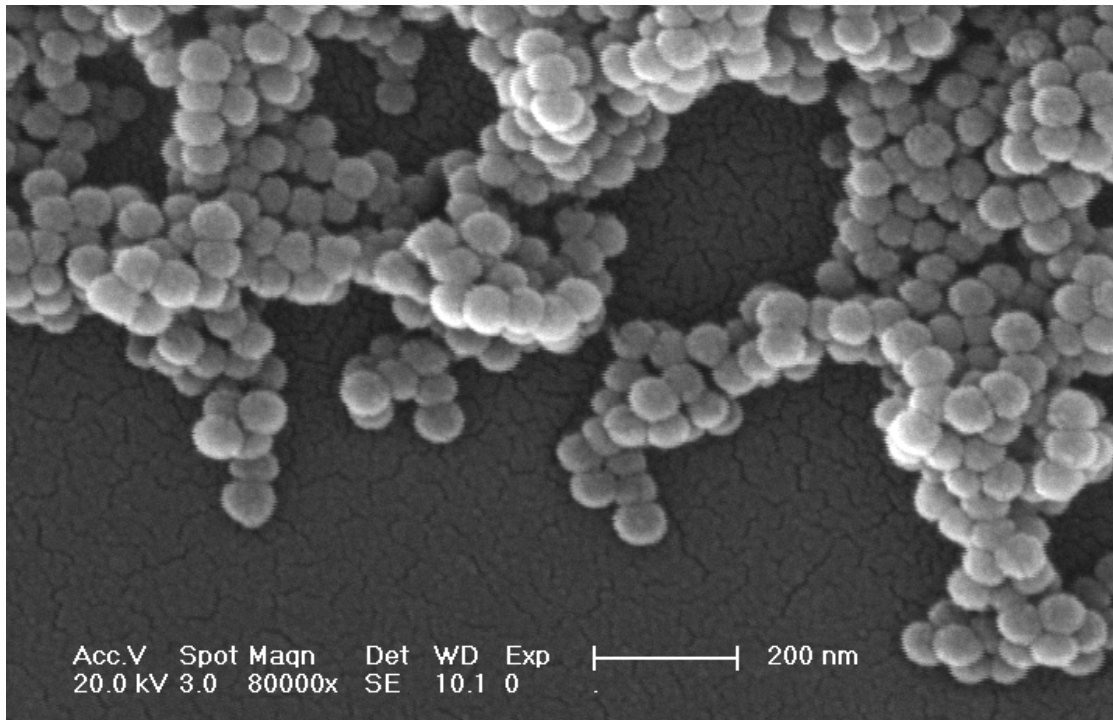

**Fig S2** SEM images of the guanine-modified SiNPs: TEOS/Guanidine (1:1)

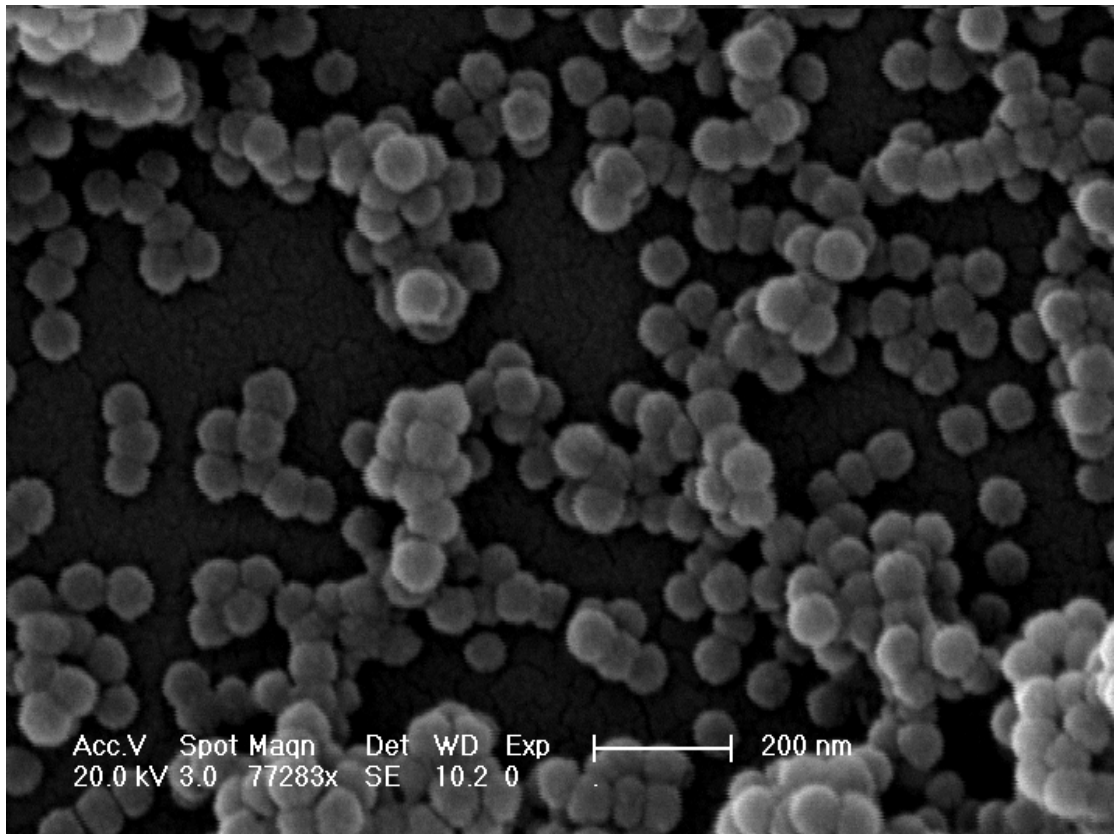

**Fig S3** SEM images of the guanidine-modified SiNPs: TEOS/Guanidine (1:1.5)

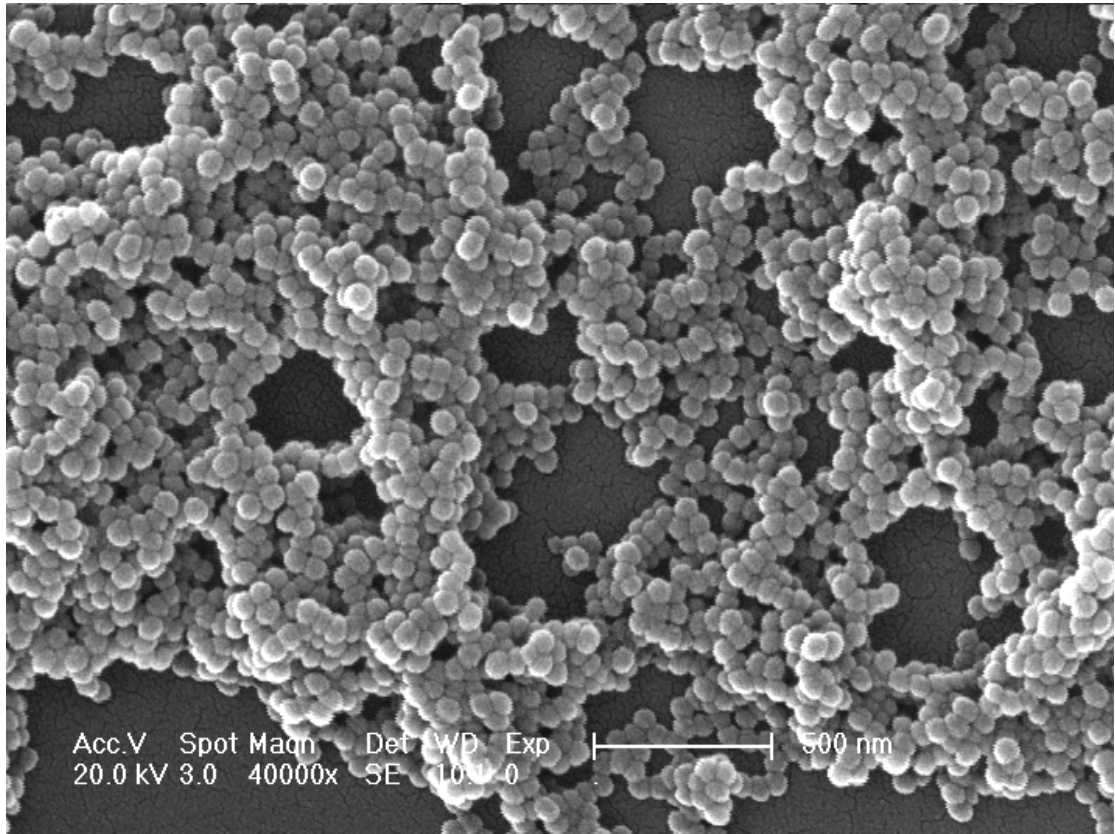

**Fig S4** SEM images of the guanidine-modified SiNPs: TEOS/Guanidine (1:3)

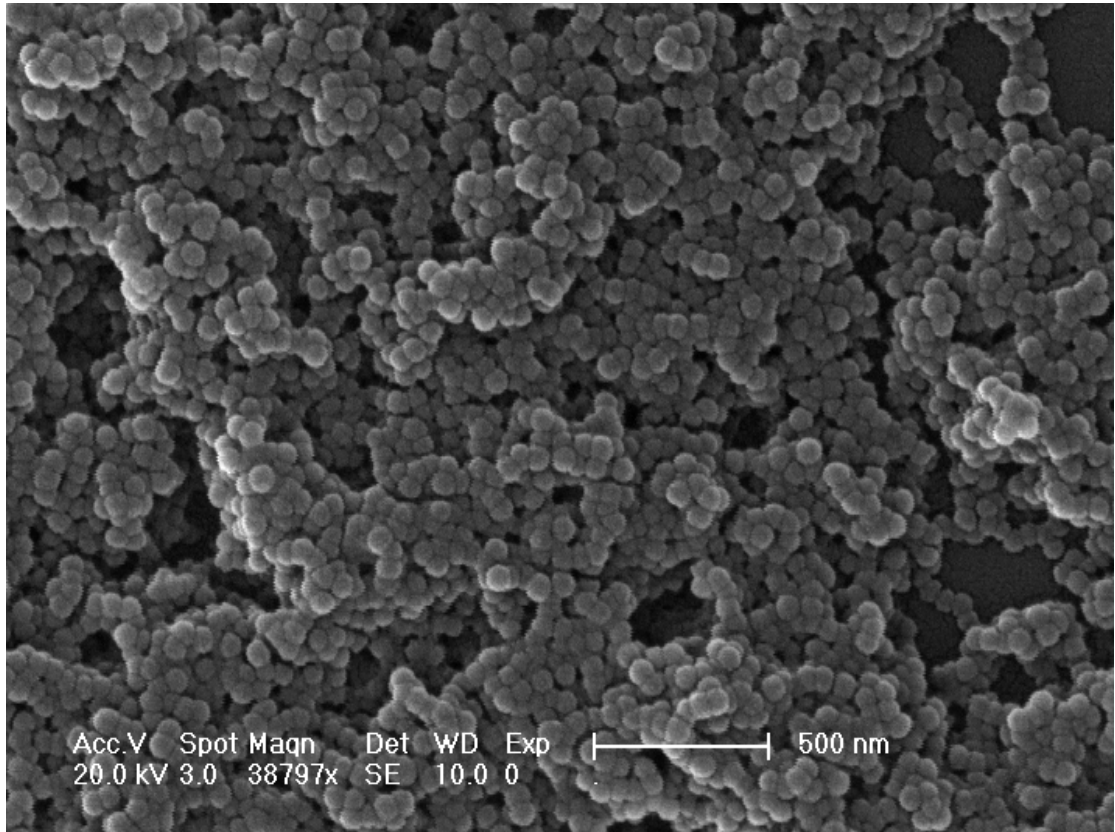

**Fig S5** SEM images of the guanidine-modified SiNPs: TEOS/Guanidine (1:6)

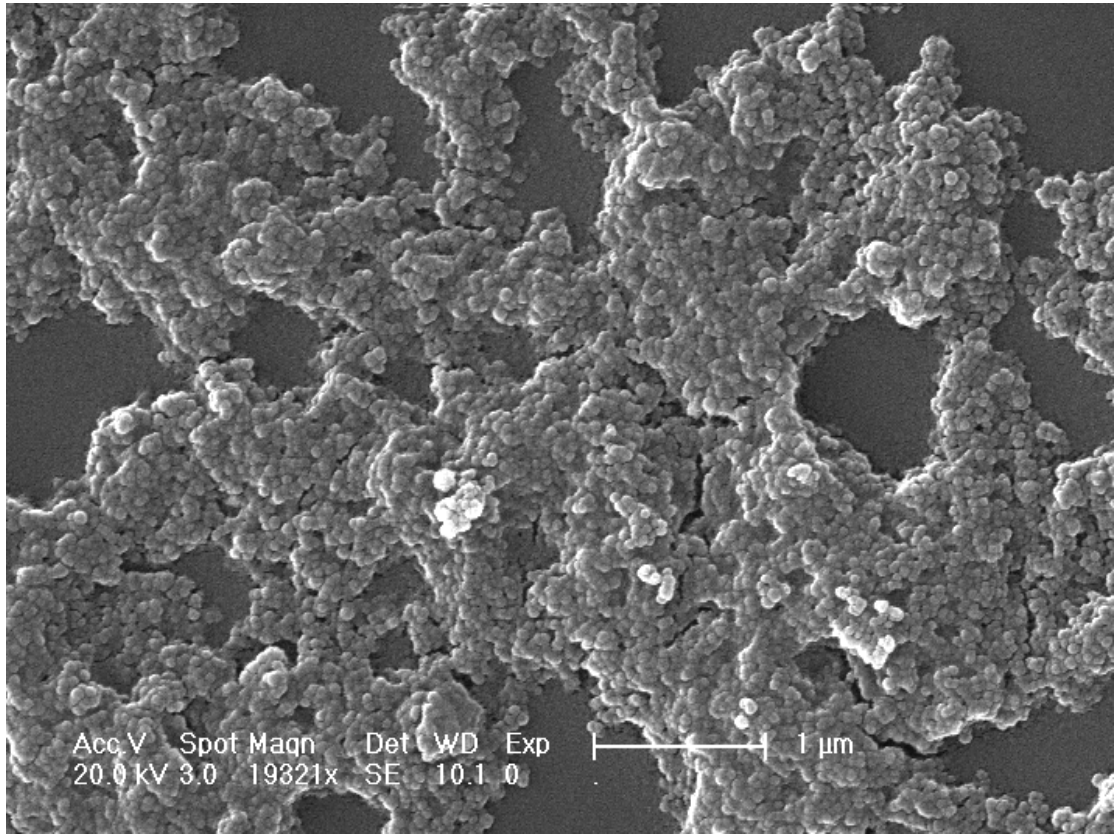

**Fig S6** SEM images of the guanidine-modified SiNPs: TEOS/Guanidine (1:9)

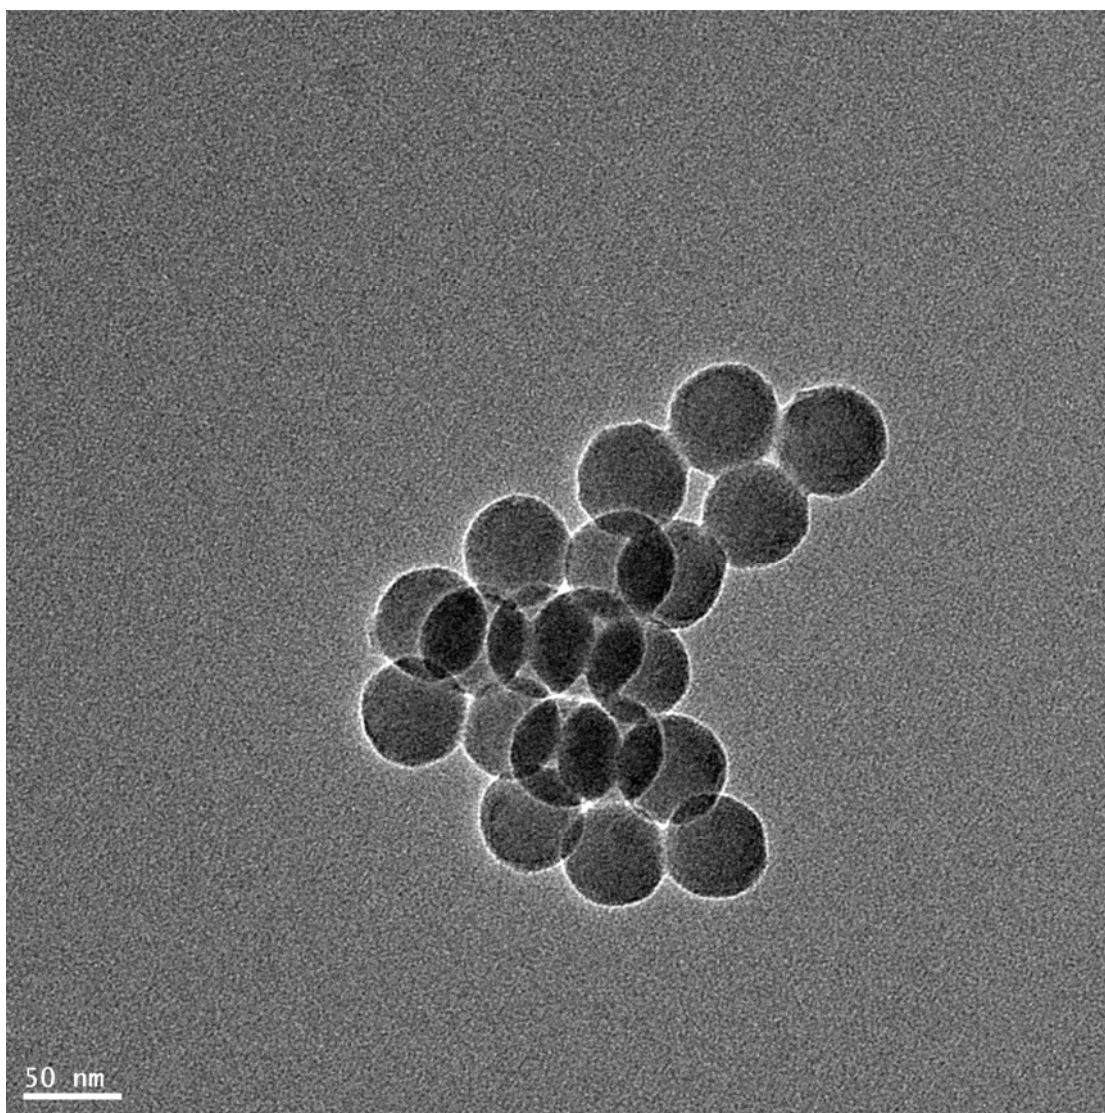

**Figure S7** TEM images of the guanidine functionalized SiNPs



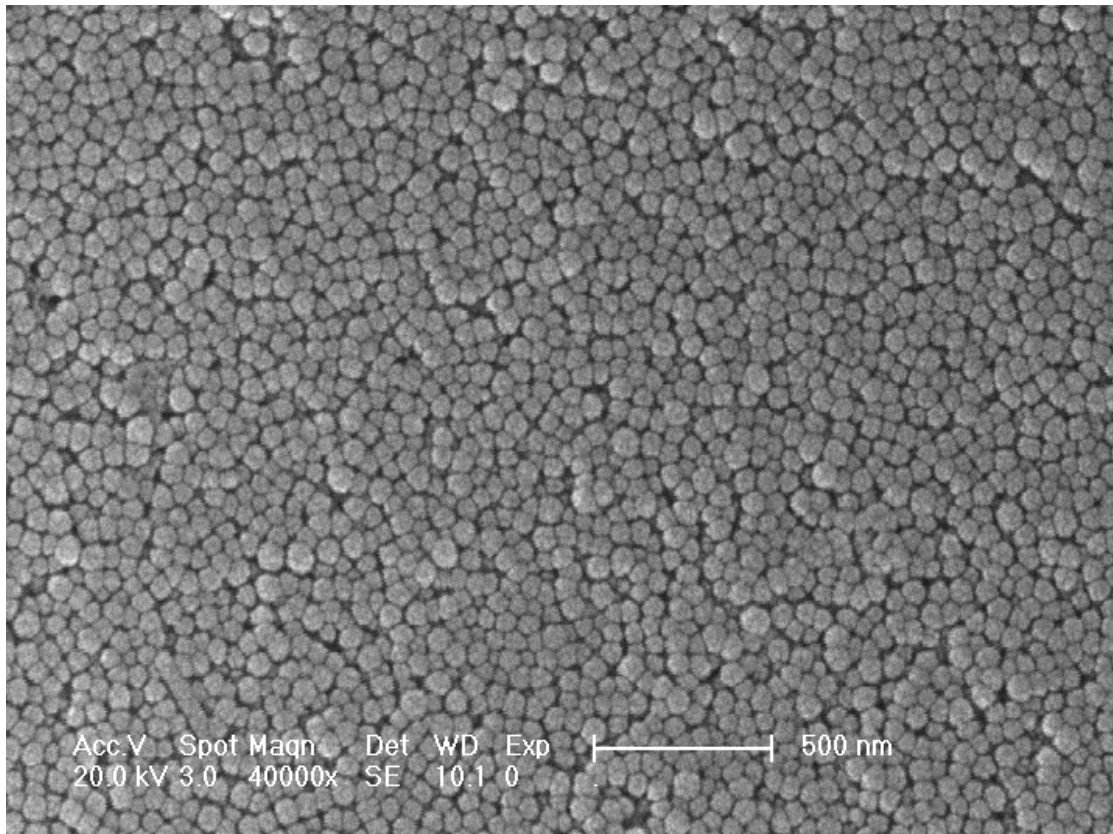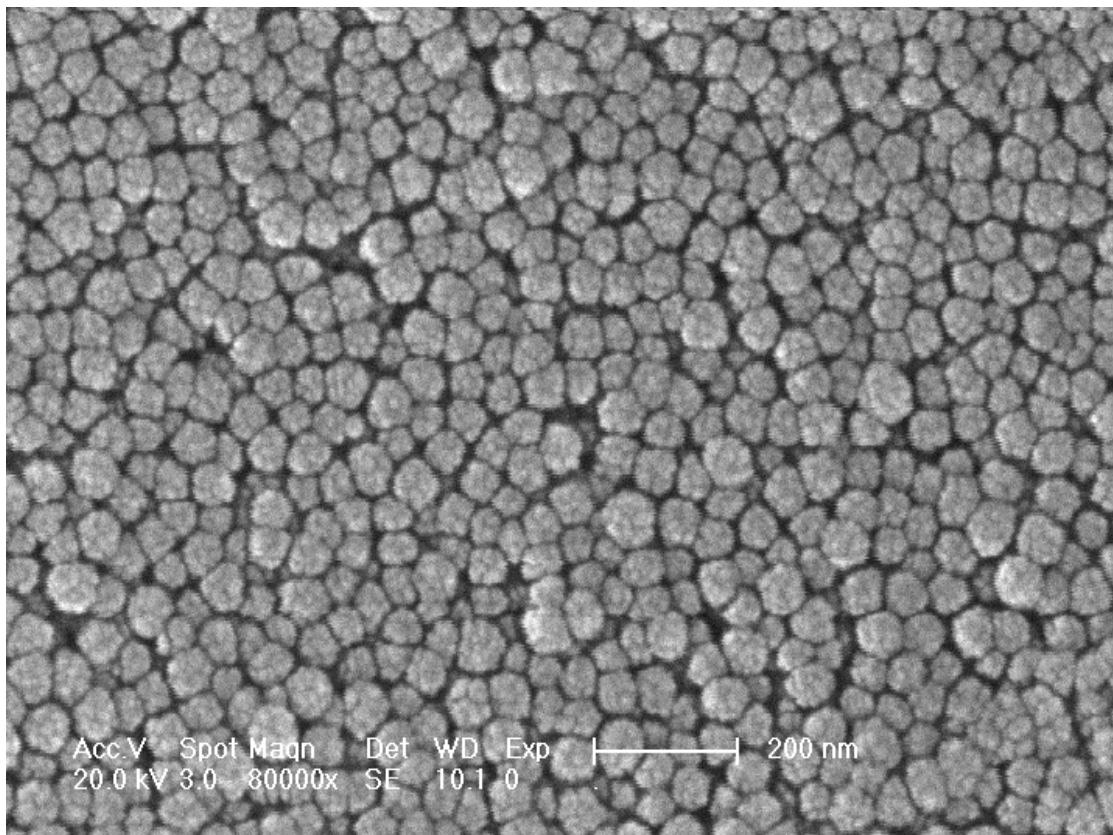

**Figure S8** SEM images of QDs fixed on the guanidine functionalized SiNPs.

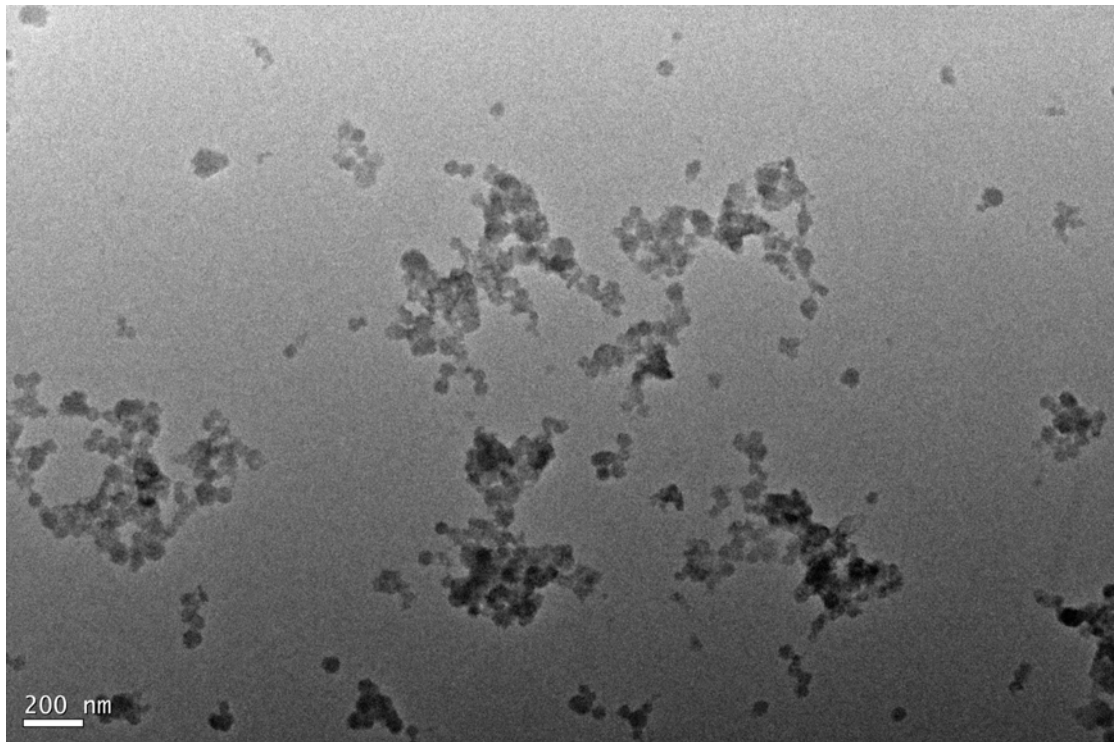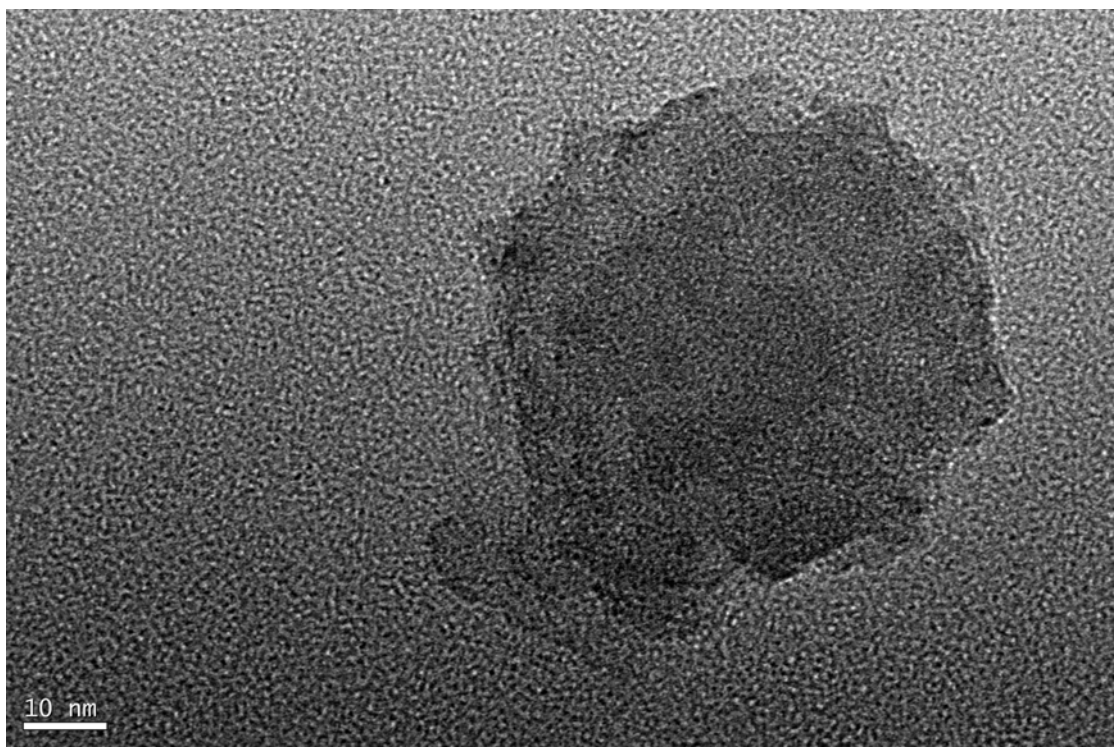

**Figure S9** TEM images of QDs fixed on the guanidine functionalized SiNPs.

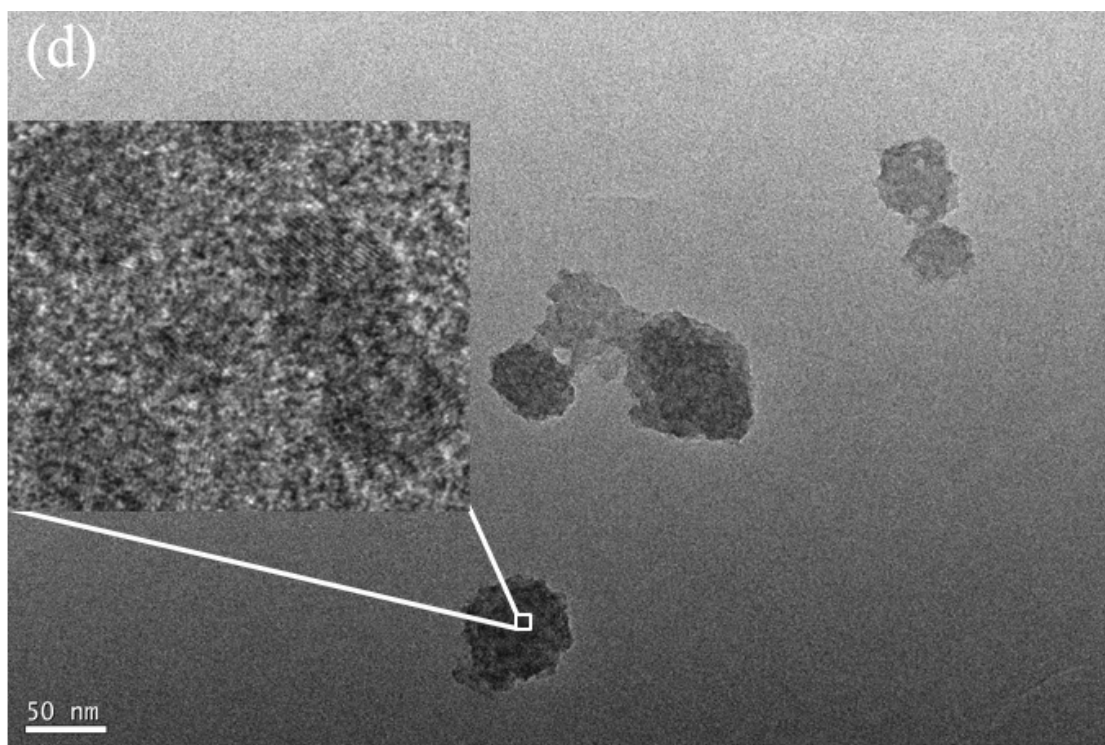

**Fig S10** TEM images of QDs fixed on the guanidine functionalized SiNPs.

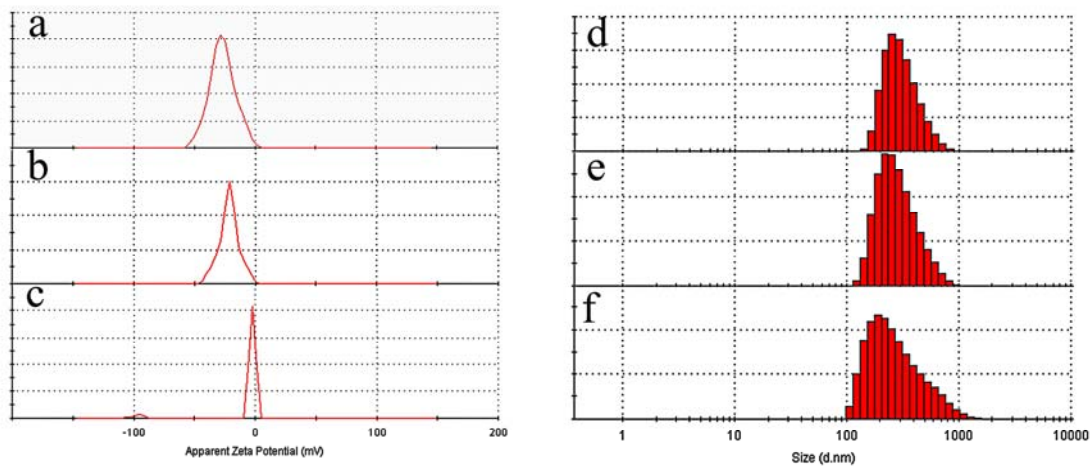

**Fig. S11** Zeta potential and DLS measurement of (a, d) SiNPs, (b, e) modified SiNPs with guanidine and (c, f) modified SiNPs with guanidine coated with CdTe QDs.

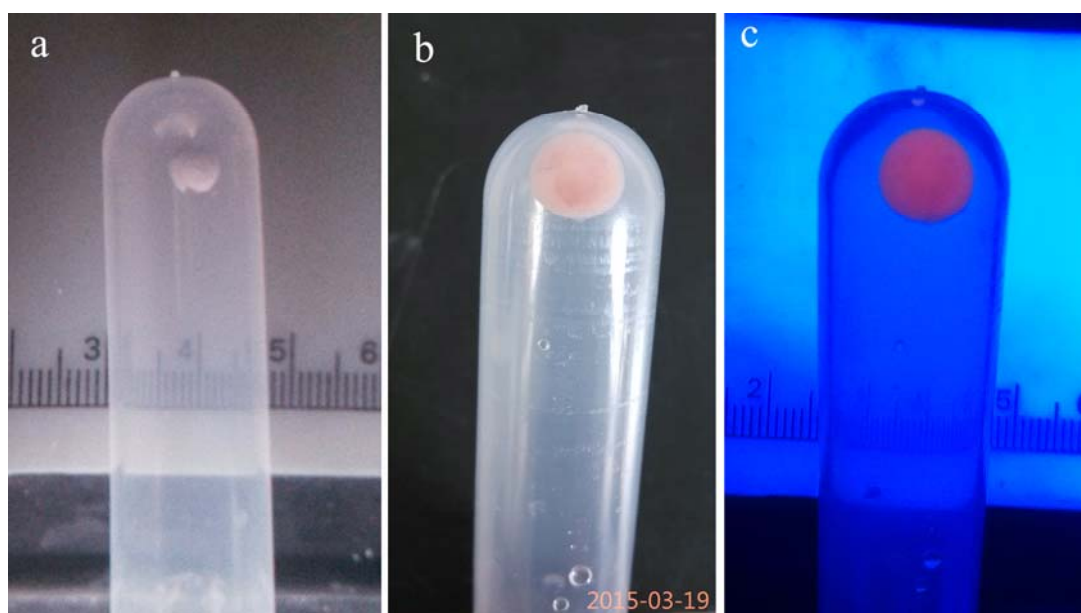

**Figure S12** (a) the photograph of guanidine-modified SiNPs; (b) the photograph of CdTe QDs (600 nm) fixed on the guanidine-modified SiNPs; (c) the fluorescent photograph of CdTe QDs (600 nm) fixed on the guanidine-modified SiNPs (excitation wavelength, 365 nm)

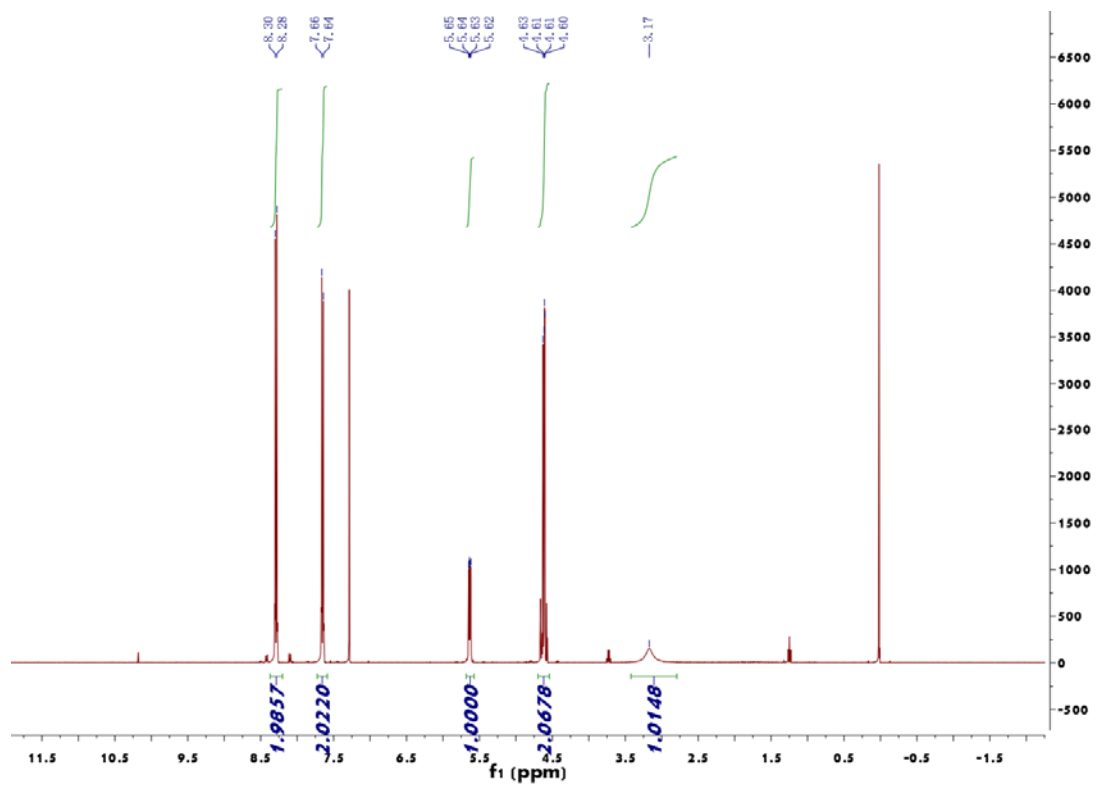

**Figure S13** The <sup>1</sup>H NMR spectrum of 2-nitro-1-(4-nitrophenyl) ethanol in CDCl<sub>3</sub>.

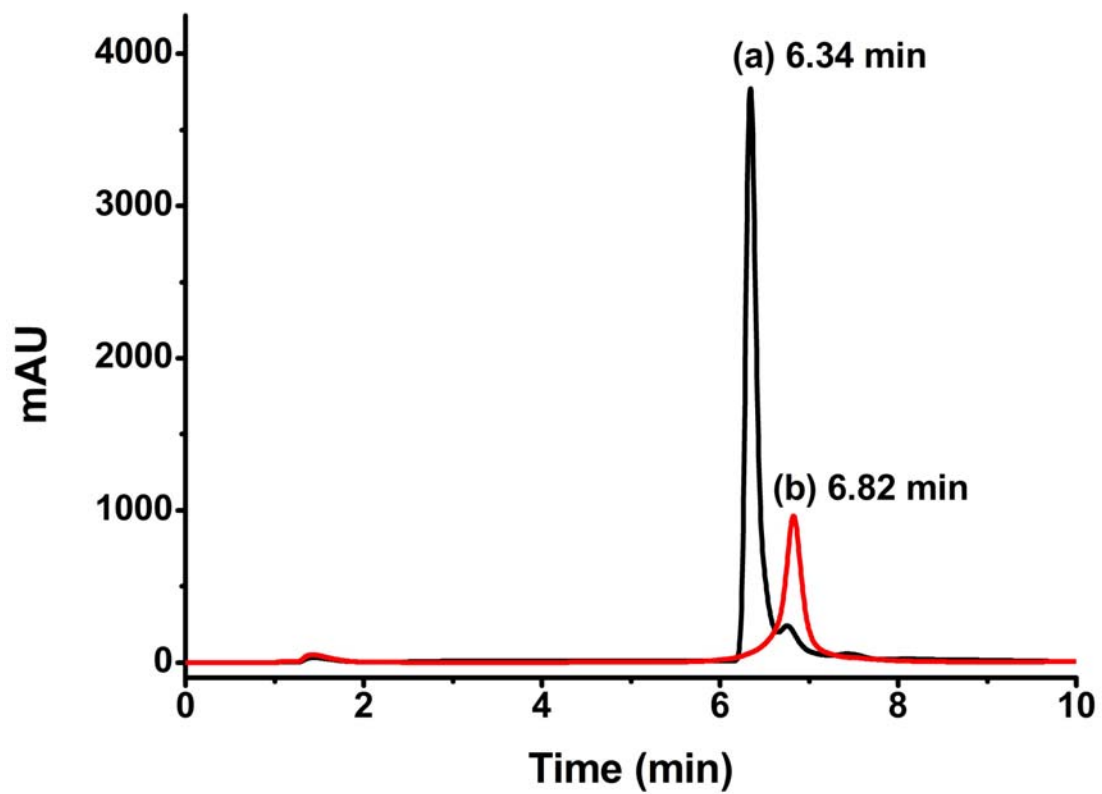

**Figure S14** Chromatograms of (a) product and (b) p-nitrobenzaldehyde of Henry reaction.
